# Supplementary material
Source: publisher site journal article supplement (https://spandidos-publications.com/6243/downloadSupplementary)

Figure S1. Flowchart of the distribution of the gemcitabine plus cisplatin therapy schedule. The anticancer drugs were administered on days 1, 2, 8 and 15. This shows the number of cycles those could be given anticancer drug on schedule or not.

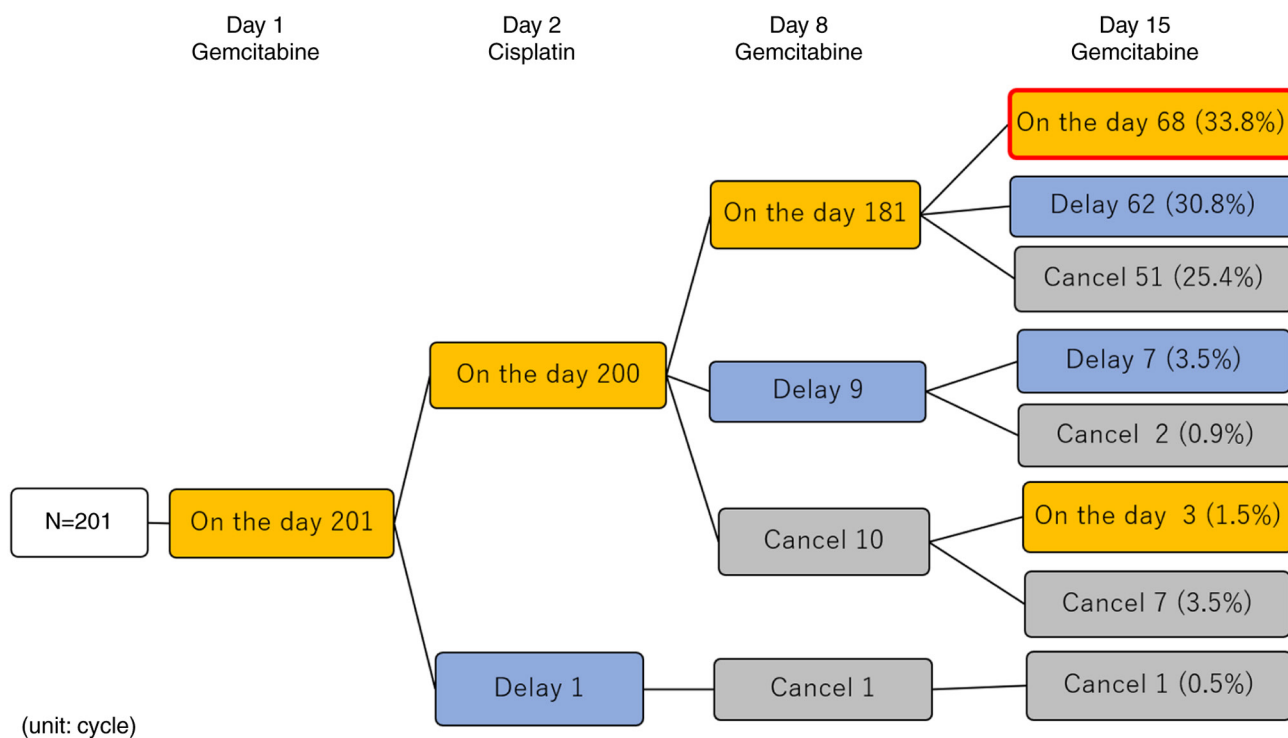

Supplement: Supplementary file 1 [file downloadSupplementary]
